1 ***In vivo* calcium imaging visualizes peripheral neuron sensitization in murine osteoarthritis**

2

3 Rachel E. Miller, PhD<sup>1,2\*</sup>, Yu Shin Kim, PhD<sup>3,4</sup>, Phuong B. Tran, PhD<sup>1</sup>, Xinzhong Dong, PhD<sup>3,5</sup>,  
4 Richard J. Miller, PhD<sup>6</sup>, Anne-Marie Malfait, MD, PhD<sup>1,2\*</sup>

5 <sup>1</sup>Department of Internal Medicine, Division of Rheumatology;

6 <sup>2</sup>Department of Biochemistry, Rush University Medical Center, 1611 W. Harrison St, Suite 510,  
7 Chicago, IL 60612;

8 <sup>3</sup>Departments of Neuroscience, Neurosurgery, and Dermatology, Center of Sensory Biology,  
9 Johns Hopkins University School of Medicine, Baltimore, MD;

10 <sup>4</sup>Department of Neuroscience & Cell Biology, University of Texas Medical Branch School of  
11 Medicine, Galveston, TX;

12 <sup>5</sup>Howard Hughes Medical Institute, Johns Hopkins University School of Medicine, Baltimore,  
13 MD;

14 <sup>6</sup>Department of Pharmacology, Northwestern University, Chicago, IL

15

16 **\*Corresponding authors:**

17 Anne-Marie Malfait, MD, PhD

18 [anne-marie\\_malfait@rush.edu](mailto:anne-marie_malfait@rush.edu)

19 T: +1-312-563-2925

20 F: +1-312-563-2267

21

22 Rachel E. Miller, PhD

23 [rachel\\_miller@rush.edu](mailto:rachel_miller@rush.edu)

24 T: +1-312-563-2021

25 F: +1-312-563-2267

26

27 **Grant Support:**

28 Rachel Miller was supported by the US National Institutes of Health/National Institute of  
29 Arthritis and Musculoskeletal and Skin Diseases (NIH/NIAMS) (F32AR062927 and  
30 K01AR070328). Anne-Marie Malfait (R01AR064251 and R01AR060364) and Richard Miller  
31 (R01AR064251) were supported by NIAMS.

32 **Abstract**

33 **Objective** – The purpose of this study was to develop a method for analyzing sensory neuron  
34 responses to mechanical stimuli *in vivo*, and to evaluate whether these neuronal responses change  
35 after destabilization of the medial meniscus (DMM).

36 **Methods** – DMM or sham surgery was performed in 10-week old male C57BL/6 wild-type or  
37 Pirt-GCaMP3<sup>+/-</sup> mice. All experiments were performed eight weeks after surgery. Knee and hind  
38 paw hyperalgesia were assessed in wild-type mice. The retrograde label DiI was injected into the  
39 ipsilateral knee to quantify the number of knee-innervating neurons in the L4 dorsal root  
40 ganglion (DRG) in wild-type mice. *In vivo* calcium imaging was performed on the ipsilateral L4  
41 DRG of Pirt-GCaMP3<sup>+/-</sup> mice as mechanical stimuli (paw pinch, knee pinch, knee twist) were  
42 applied to the ipsilateral hind limb.

43 **Results** – Eight weeks after surgery, DMM mice had more hyperalgesia in the knee and hind  
44 paw compared to sham mice. Intra-articular injection of DiI labeled similar numbers of neurons  
45 in the L4 DRG of sham and DMM mice. Increased numbers of sensory neurons responded to all  
46 three mechanical stimuli in DMM mice, as assessed by *in vivo* calcium imaging. The majority of  
47 responses in sham and DMM mice were in small-to-medium-sized neurons, consistent with the  
48 size of nociceptors. The magnitude of responses was similar between sham and DMM mice.

49 **Conclusions** - We demonstrated that increased numbers of small-to-medium sized DRG neurons  
50 respond to mechanical stimuli 8 weeks after DMM surgery, suggesting that nociceptors have  
51 become sensitized by lowering the response threshold.

52

53

54

## 55 **Introduction**

56           Nervous system sensitization, as determined by quantitative sensory testing, is associated  
57 with osteoarthritis (OA) and has been shown to correlate with symptom severity (1, 2). In knee  
58 OA, sensitization is associated with the presence of inflammation (3). A number of studies in  
59 small cohorts have suggested that following hip or knee joint replacement, sensitization is often  
60 reversed and this is associated with symptom relief (4-6).

61           Sensitization is also a feature of experimental OA, and can be detected by evaluating  
62 pain-related behaviors in animals, including mechanical allodynia and mechanical hyperalgesia  
63 of the hind limb (for review (7)). Previous work has shown that after destabilization of the  
64 medial meniscus (DMM), mice develop slowly progressive joint damage concurrent with pain-  
65 related behaviors indicative of sensitization, including hind paw mechanical allodynia and knee  
66 hyperalgesia, which develop prior to the manifestation of spontaneous pain behaviors such as  
67 locomotive deficits (8-11). In order to develop targeted analgesic strategies, the neuronal  
68 mechanisms that mediate this sensitization to mechanical stimuli need to be defined. Therefore,  
69 we sought to develop a method for analyzing peripheral sensory neuron activity in response to  
70 mechanical stimuli in real-time *in vivo*.

71           *In vivo* electrophysiology enables monitoring responses in knee-innervating afferent  
72 nerve fibers while physical stimuli are applied to the knee, but only one fiber may be measured at  
73 a time (12). In contrast, recently developed *in vivo* calcium imaging methods allow the  
74 simultaneous visualization of calcium (Ca)<sub>i</sub> responses of hundreds of neurons within the dorsal  
75 root ganglion (DRG) (13, 14). In the current study, we adapted this novel method in order to  
76 visualize sensitization of knee and hind paw afferents after DMM or sham surgery in response to  
77 three types of physical stimuli applied to the hind limb. Operated mice were subjected to a low-  
78 level non-noxious stimulus below the threshold that would normally elicit a behavioral response,  
79 first through a paw pinch; and secondly, through a knee pinch. We also applied a noxious  
80 stimulus above the threshold that would elicit a behavioral response, by applying a noxious knee  
81 twist. We monitored neuronal responses in the L4 DRG by real-time *in vivo* calcium imaging.  
82 We focused on the 8-week time point after surgery because we have previously shown this to be  
83 a transition period from a state of acute to chronic pain (10, 15, 16), and it is when all pain-  
84 related behaviors associated with mechanical stimuli are apparent in the model (10, 11, 15).

85 **Methods:**

86 **Animals:** A total of 85 mice were used. All animal experiments were approved by the  
87 Institutional Animal Care and Use Committees at Rush University Medical Center, Northwestern  
88 University, and Johns Hopkins University. Animals were housed with food and water *ad libitum*  
89 and kept on 12-hour light cycles. C57BL/6 wild-type and Pirt-GCaMP3<sup>+/-</sup> mice were bred at  
90 Rush. Pirt-GCaMP3 mice express the fluorescent calcium indicator, GCaMP3, in ~90% of all  
91 sensory DRG neurons, and not in other peripheral or central tissues, through the Pirt promoter  
92 (13, 17).

93 **Surgery:** DMM surgery was performed in the right knee of 10-week old male mice (25 – 30 g),  
94 as previously described (10, 18), under isoflurane anesthesia. Briefly, after medial parapatellar  
95 arthrotomy, the anterior fat pad was dissected to expose the anterior medial meniscotibial  
96 ligament, which was severed. The knee was flushed with saline and the incision closed. Sham  
97 surgery followed the same procedure to expose the anterior medial meniscotibial ligament, but  
98 the ligament was left intact. Mice were not administered analgesia after surgery.

99 **Knee and Hind Paw Hyperalgesia:** Knee hyperalgesia was measured in wild-type mice (n=7  
100 naïve; n=6 sham; n=9 DMM) using a Pressure Application Measurement (PAM) device (Ugo  
101 Basile, Varese, Italy) as previously described (15, 19, 20). Briefly, mice were restrained by hand  
102 and the hind paw was lightly pinned with a finger in order to hold the knee in flexion at a similar  
103 angle for each mouse. With the knee in flexion, the PAM transducer was pressed against the  
104 medial side of the ipsilateral knee while the operator's thumb lightly held the lateral side of the  
105 knee. The PAM software guided the user to apply an increasing amount of force at a constant  
106 rate (30 g/s), up to a maximum of 450 g. If the mouse tried to withdraw its knee, the force at  
107 which this occurred was recorded. If the mouse did not try to withdraw, the maximum possible  
108 force of 450 g was assigned. Two measurements were taken per knee and the withdrawal force  
109 data were averaged. Hind paw hyperalgesia was measured in the same way (n=9 naïve; n=5  
110 sham; n=8 DMM), but the PAM transducer was applied to the ventral aspect of the ipsilateral  
111 hind paw with the operator's thumb against the dorsal aspect.

112 **In vivo calcium imaging:** Six to seven weeks after surgery, Pirt-GCaMP3<sup>+/-</sup> mice were shipped  
113 from Rush to Johns Hopkins University and were allowed to recover for one to two weeks. Eight

114 weeks after surgery, mice were deeply anesthetized using sodium pentobarbital (40-50 mg/kg),  
115 and the back and operated knee were shaved. A laminectomy from vertebrae L2-L6 was  
116 performed, and the L4 DRG was exposed, as previously described (13). The L4 DRG was  
117 chosen since it contains the cell bodies of the majority of sensory neurons that innervate the knee  
118 of the mouse (21, 22). The mouse was positioned under a laser scanning confocal microscope  
119 (Leica LSI) by clamping the spinal column at L2 and L6 using forceps attached to  
120 micromanipulators. Anesthesia was maintained using isoflurane during imaging and  
121 temperature was maintained using a homeothermic blanket system. Images were acquired using  
122 a 0.5 N.A. macro dry objective and an EM-CCD camera (488 nm excitation, 500-550 nm  
123 emission). In order to capture the entire visible area of the DRG, z-stacks were taken at 600 Hz  
124 in 10 steps over a distance of 200-300  $\mu\text{m}$  at 512x512 pixel resolution in the x-y plane. A time  
125 series was performed such that in total, approximately 15 z-stacks were taken for each stimulus.  
126 Each z-stack took approximately 7-8 seconds to achieve. For each mouse (n=12 sham, n=14  
127 DMM), physical stimuli were applied to the ipsilateral limb in the following order: 1. A 100g  
128 force was applied to the hindpaw using a calibrated forceps system (IITC Rodent Pincher); 2. A  
129 30g force was applied to the knee using the same calibrated forceps system; 3. A noxious  
130 outward rotation ( $\sim 60^\circ$ , approximately 40-60 mNm torque (12), which is beyond the normal  
131 physiological range but does not cause joint injury (23, 24)) was applied to the knee by holding  
132 the femur in place with a forceps while the hind paw is used to rotate the lower leg ('knee twist').  
133 One sham mouse was excluded from the knee twist analysis due to excessive movement during  
134 imaging. For each stimulus, baseline images were captured for 5-6 z-stacks (approximately 45  
135 seconds) prior to the application of the stimulus, the stimulus was applied for 5 z-stacks, and an  
136 additional 4-5 z-stacks were captured after the stimulus was discontinued. Between each  
137 stimulus, the mouse was allowed to recover for at least 3 minutes in order to ensure that all  
138 previous neuron responses had ceased and the fluorescence levels had returned to baseline. Pilot  
139 experiments demonstrated that the order of the applied stimuli did not change the number of  
140 responses, indicating that these acute stimuli were not sufficient to induce sensitization and thus  
141 did not seem to affect the following stimulus applied. At the end of each experiment, a high-  
142 resolution z-stack was taken at 1024x1024 pixel resolution with 4-8 frame averaging to use for  
143 counting the total number of neurons.

144 **Analysis of *in vivo* calcium imaging:** Using the Leica software, a maximum intensity projection  
145 was performed for each z-stack in a particular time series, and the files were exported for further  
146 processing in Fiji (25) using custom macros and the Multi Measure plug-in. Brightness and  
147 contrast were adjusted, and all videos were first analyzed by a blinded observer to identify  
148 responding cells by looking for an increase in fluorescence during the stimulus application  
149 period. All responding cells were labeled as a region of interest (ROI) for further analysis. Cells  
150 spontaneously responding prior to application of the stimulus were ignored – in general, there  
151 were few spontaneous responses and there was no difference between sham and DMM groups.  
152 In addition, responses that occurred upon release of the stimulus were ignored. The total number  
153 of neurons imaged for each DRG was estimated by counting the number of neurons within a  
154 region of average density and extrapolating to the total DRG area. In order to confirm the visual  
155 assessment, changes in  $(Ca)_i$  were quantified by calculating the change in fluorescence for each  
156 ROI in each frame  $t$  of a time series using the formula:  $\Delta F/F_0 = (F_t - F_0) / F_0$ , where  $F_0$  = the  
157 average intensity during the baseline period prior to the application of the stimulus. For each  
158 stimulus, the maximum  $\Delta F/F_0$  and area under the curve was calculated for each responding cell  
159 in a particular DRG. In order to compare the sizes of responding cells between sham and DMM  
160 mice for a particular stimulus, the areas of the ROIs were calculated in Fiji. For each mouse, a  
161 frequency distribution using relative frequencies was computed for the responding cell areas  
162 using a bin range with bin centers from 150-1550  $\mu m^2$  and a bin width of 100  $\mu m^2$ . Areas greater  
163 than 800  $\mu m^2$  were summed into one bin. The calculated relative frequencies for each size  
164 category were averaged across the mice for either DMM or sham treatment.

165 **Histopathology of the knee:** Following *in vivo* calcium imaging, mice were euthanized by  
166 carbon dioxide inhalation, and knees were collected for histopathology and were evaluated based  
167 on modified OARSI recommendations, as previously described (n=12 DMM; n=11 sham) (26)  
168 (Alison Bendele, Bolder BioPATH, Inc., Boulder CO). Joints were fixed in 10% formalin,  
169 decalcified, embedded in the frontal plane, sectioned (8  $\mu m$ ), and stained with Toluidine blue  
170 (0.04% w/v). A coronal section from the mid-joint (area of maximal damage (18)) was used to  
171 score the medial femoral condyles and tibial plateaux for severity of cartilage degeneration. For  
172 each cartilage surface, scores were assigned individually to each of 3 zones (inner, middle, outer)  
173 on a scale of 0-5, with 5 representing the most damage (maximal summed score for femoral +

174 tibial cartilage degeneration = 30). The largest osteophyte (medial tibia or femur) was measured  
175 using an ocular micrometer.

176 **Retrograde Labeling and Immunofluorescence:** Wild-type DMM mice 8 weeks post-surgery  
177 (n=6) along with age-matched naïve (n=3) and sham (n=6) controls were anesthetized with  
178 isoflurane and intra-articularly injected in the ipsilateral right knee with 5  $\mu$ L DiI (2.5 mg/mL in  
179 methanol; ThermoFisher, D3911). One week post-injection, mice were anesthetized by ketamine  
180 and xylazine and perfused transcardially with PBS followed by 4% paraformaldehyde in PBS.  
181 The spinal column was dissected and postfixed in 4% paraformaldehyde overnight followed by  
182 cryopreservation in 30% sucrose in PBS. Ipsilateral L4 DRG were embedded with OCT (Tissue-  
183 Tek), frozen with dry ice, and cut into 12  $\mu$ m sections. For immunostaining, slides were allowed  
184 to dry at room temperature for 2 h, postfixed with 4% paraformaldehyde for 10 min, and washed  
185 with PBS. Sections were blocked and permeabilized with 5% normal goat serum in 0.1% triton  
186 in PBS prior to incubation with PGP9.5 rabbit polyclonal antibody (Abcam ab27053; 1:200)  
187 overnight at 4 °C. Sections were washed with PBS and incubated with appropriately conjugated  
188 AlexaFluor 488 antibody (Invitrogen, 1:500) for 1 h at room temperature. Lastly, the sections  
189 were washed with PBS and mounted with Vectashield mounting media. DiI (549-565 nm  
190 excitation) and PGP9.5 signals were captured using a confocal microscope and the images were  
191 analyzed using ImageJ and Photoshop. For quantification, three sections per DRG were used.  
192 The number of neurons that expressed DiI were summed across the 3 sections and normalized to  
193 the total number of DRG neurons (PGP9.5+) summed across the 3 sections. The counts for  
194 DMM and sham mice were performed in a blinded fashion.

195 **Statistics:** GraphPad Prism version 6.07 was used for statistical calculations. Data are expressed  
196 as either mean  $\pm$  standard error of the mean (SEM) or median  $\pm$  interquartile range (IQR), as  
197 indicated. For hyperalgesia experiments, groups were compared by one-way ANOVA followed  
198 by Tukey's multiple comparisons test. A p-value  $<$  0.05 was considered to be significant. For  
199 numbers of responding cells, clustering, nearest neighbor distance, change in fluorescence, and  
200 area under the curve, data were tested for normality by D'Agostino & Pearson omnibus  
201 normality test. If data passed the normality test, an unpaired t test was used; otherwise, a Mann-  
202 Whitney test was used. For size of responding cells to a particular stimulus, a two-way ANOVA  
203 followed by Sidak's multiple comparisons test was used to compare average relative frequencies

204 for each size category between sham and DMM mice, and a Mann-Whitney test was used to  
205 compare the median size of responding cells between sham and DMM mice. For retrograde  
206 labeling, groups were compared by Kruskal-Wallis test followed by Dunn's multiple  
207 comparisons test.



208 **Results:**

209 **More neurons respond to mechanical stimuli applied to the hind limb 8 weeks after DMM**

210 **than after sham surgery** – Eight weeks after surgery, wild-type DMM mice had increased  
211 primary hyperalgesia in the knee joint compared to sham and naïve mice (Fig 1A), similar to our  
212 previous results (15), and this was accompanied by secondary hyperalgesia in the hind paw (Fig  
213 1B). Both behaviors are indicative of sensitization. Therefore, we focused on this time point for  
214 all imaging experiments and imaged the L4 DRG, since these ganglia contain the majority of the  
215 cell bodies of sensory neurons that innervate the mouse hindlimb, including both the paw and the  
216 knee. For each DRG, we imaged a similar number of neurons for DMM ( $981 \pm 69$ ) and sham  
217 ( $990 \pm 53$ ) mice ( $p=0.9194$ ) (Fig 2A – example images). Eight weeks after surgery, we observed  
218 that, for all 3 stimuli, an increased percentage of neurons in DMM mice responded compared to  
219 sham mice, as evidenced by an increase in transient  $(Ca)_i$  following stimulation (Fig 2B-D;  
220 Supplemental Videos 1-6). The noxious knee twist induced more responses than the 30-g knee  
221 pinch in sham mice ( $p=0.0199$ ), but the two stimuli induced similar numbers of responses in  
222 DMM mice ( $p=0.1908$ ). Following imaging, a subset of knees was analyzed to confirm joint  
223 damage. Similar to previous studies (10, 26), DMM mice developed moderate levels of cartilage  
224 damage ( $n=12$ ; mean $\pm$ SEM:  $7.7 \pm 1.0$ ) and osteophytes ( $159 \pm 16 \mu\text{m}$ ) in the medial compartment  
225 by this time point, while sham mice did not develop joint damage ( $n=11$ ; cartilage damage =  
226  $0 \pm 0$ ); osteophyte width =  $0 \pm 0$ ).

227 **Similar sized neurons respond in sham and DMM mice** – In order to define which types of

228 neurons responded before and after surgery, we assessed the size distribution of these cells. The  
229 majority of responses to all stimuli were in small-to-medium sized neurons (area  $< 600 \mu\text{m}^2$ ),  
230 consistent with the size of C and  $A\delta$  fiber neurons, the majority of which are nociceptors (27, 28)  
231 (relative frequencies shown in Fig 3A-C). However, there was no difference in the size  
232 distribution (Fig 3A-C) of responding neurons between sham and DMM mice for any of the  
233 three stimuli ( $p>0.8$  for all comparisons). In addition, the median area was similar between sham  
234 and DMM mice for all three stimuli (paw pinch  $p=0.6770$ , knee pinch  $p=0.9798$ , knee twist  
235  $p=0.8089$ ) and was consistent with the size of small neurons ( $284\text{-}313 \mu\text{m}^2$ ) (Fig 3D). Together,  
236 these data suggest that C and  $A\delta$  fiber neurons have become sensitized by 8 weeks after DMM  
237 surgery, as opposed to larger  $A\beta$  fibers being recruited.

238 **Similar numbers of neurons innervate the knee in sham and DMM mice** – In order to  
239 exclude the possibility that the number of sensory neurons innervating the knee was increased 8  
240 weeks after DMM, we performed retrograde labeling using DiI. Similar numbers of neurons  
241 were labeled in the L4 DRG of naïve mice 18 weeks of age and in sham and DMM mice 8 weeks  
242 after surgery (Table 1; Supp Fig 1). This result suggests that the number of sensory neurons  
243 innervating the knee remained the same over the course of the experiment.

244 **No change in the spatial organization of responses between sham and DMM mice** – A recent  
245 report using this same *in vivo* calcium imaging technique demonstrated that in models of  
246 inflammatory and neuropathic pain, an increase in numbers of neuronal responses was associated  
247 with an increase in neuronal coupling (neurons immediately adjacent to each other responding to  
248 the same stimulus), which may represent a mechanism for neuronal sensitization through gap  
249 junctions (13). In contrast, in the current study, we found similar instances of neuronal coupling  
250 in both sham and DMM mice for all 3 stimuli (for an example of coupling, see arrows in insets  
251 of Fig 2A pointing to clusters of neurons). The percentage of coupled responding neurons (Fig  
252 4A) as well as the mean number of neurons forming the clusters (Fig 4B) was similar between  
253 sham and DMM mice, suggesting that the formation of these clusters may be more associated  
254 with acute tissue injury as opposed to the chronicity of pain in this model. In addition, the  
255 median nearest neighbor distance of responding neurons was similar between sham and DMM  
256 mice for all stimuli (Fig 4C).

257 **No change in the magnitude or duration of responding neurons** – The intensity of each  
258 responding neuron was also assessed by quantifying the change in fluorescence with time  
259 (sample responses are shown in Fig 5A for responses to paw pinch in one DMM DRG). Overall,  
260 the maximum magnitude (Fig 5B) and duration (measured by area under the curve) (Fig 5C) of  
261 the responding population of neurons remained the same when comparing sham and DMM mice  
262 for all 3 stimuli, suggesting that the increased number of neurons recruited in the case of DMM  
263 mice is responsible for the increased sensitivity through lowering of the response threshold to  
264 these stimuli. For both sham and DMM mice, the noxious knee twist induced the largest  
265 magnitude and duration of response, which is consistent with the pain level induced by this  
266 stimulus (Fig 5B, C; Supp. Videos 5,6).

267

268 **Discussion:**

269 We demonstrated that increased numbers of DRG neurons responded to physical stimuli  
270 directed toward the operated knee and ipsilateral hind paw in mice 8 weeks after DMM surgery  
271 compared to sham-operated mice, correlating well with pain-related behaviors. In addition, it  
272 was possible to analyze the size of the population of neurons that became sensitized in an  
273 unbiased fashion, since hundreds of neurons could be monitored simultaneously without  
274 determining *a priori* which type of fiber to record.

275 Overall, the majority of responses in both sham and DMM mice occurred in small-to-  
276 medium sized neurons, consistent with the size of the cell bodies of C and A $\delta$  fibers. These fibers  
277 encompass both the nociceptor and C-low threshold mechanoreceptor populations (29). It is  
278 likely that increased (Ca)<sub>i</sub> reflects increased excitability of these neuronal populations. Thus, it  
279 appears that at the 8-week time point after DMM surgery, C and A $\delta$  fibers were sensitized such  
280 that increased numbers of neurons responded to subthreshold stimuli such as paw and knee  
281 pinches (forces below the threshold necessary to elicit a behavioral response), and also to a  
282 suprathreshold stimulus in the case of the knee twist (force that would normally cause a  
283 behavioral response). In addition, it does not appear that the increase in numbers of responses is  
284 due to recruitment of large numbers of large-diameter afferents (which are low threshold sensory  
285 neurons, not nociceptors (29)) such as the large-sized A $\beta$  fibers, which have been implicated in  
286 mediating mechanical allodynia in nerve injury models (30) and have altered electrophysiology  
287 properties in a surgical rat model of OA (31). The relevance of these responses to OA pain is  
288 further highlighted by our recent observations that chemogenetic silencing of the Nav1.8  
289 expressing population of DRG neurons, which primarily consist of C and A $\delta$  fibers, inhibited  
290 mechanical allodynia at this same time point (8 weeks) after DMM surgery (15).

291 Our results are consistent with *in vivo* electrophysiology studies that have shown that  
292 noxious outward rotation of the knee joint causes increased firing of afferents in the knee joint  
293 compared to non-noxious rotation in healthy and monoiodoacetate (MIA) treated rats and guinea  
294 pigs (12, 24, 32). In addition, the fact that we observed increased responses in small-to-medium  
295 sized DRG neurons is consistent with electrophysiology studies on joint rotation in the MIA rat  
296 model of OA pain (32, 33). The firing rate of C and A $\delta$  fiber afferents is elevated by day 14 after  
297 injection of MIA into knee joint compared to saline-injected controls, and this in response to

298 both non-noxious and noxious rotation of the knee joint (32). In addition, the mechanical  
299 threshold of firing in response to rotation decreased in MIA rats (33).

300         While we observed a marked increase in the numbers of responding neurons after DMM  
301 surgery, we did not observe a change in the spatial organization of responding neurons compared  
302 to sham mice. A recent paper by Kim *et al.* reported that the amount of neuronal coupling seen in  
303 mice 2 days after injection of Complete Freund's Adjuvant into the hind paw was elevated  
304 compared to the amount of coupling seen in naïve mice in response to a wide-range of hind paw  
305 pinch forces (13). This interneuronal coupling was mediated by communication through gap  
306 junctions, and the authors demonstrated that inhibition of connexin-43 expression in the DRG  
307 reduced the coupling as well as the pain behavior induced by this model. In the current study, we  
308 observed that the majority of neurons responding to paw pinch, knee pinch, or knee twist were  
309 adjacent to at least one other responding neuron, but we did not observe a difference in the extent  
310 of neuronal coupling between DMM and sham mice. Therefore, in this model, it does not appear  
311 that neuronal coupling in the DRG mediates the sensitization associated with the pain behaviors  
312 observed at this stage of the model, but rather may develop as a result of surgery. A limitation is  
313 that we were unable to directly compare to a non-surgical naïve group in the current study.

314         In conclusion, by adapting a novel *in vivo* imaging technique, we demonstrated that  
315 increased numbers of small-to-medium sized DRG neurons respond to mechanical stimuli 8  
316 weeks after DMM surgery. This result suggests that nociceptor sensitization occurs through  
317 recruitment of additional nociceptors by decreasing the response threshold, which may contribute  
318 to the development of chronic pain behaviors in this model. It is clear therefore, that the use of  
319 methodology such as that introduced here will provide a powerful new way of screening novel  
320 therapeutic agents that treat OA pain by reducing the excitability of the set of nociceptors  
321 recruited in association with the disease.

322

323

324 **Acknowledgements:** We would like to thank Dr. Kyoungsook Park, Dr. Qin Zheng, and Mr.  
325 Michael Anderson for assistance with imaging at Johns Hopkins University School of Medicine.

326

327 **References:**

- 328 1. Fingleton C, Smart K, Moloney N, Fullen BM, and Doody C. Pain sensitization in people  
329 with knee osteoarthritis: a systematic review and meta-analysis. *Osteoarthritis Cartilage*  
330 2015;23:1043-56.
- 331 2. Lluch E, Torres R, Nijs J, and Van Oosterwijck J. Evidence for central sensitization in  
332 patients with osteoarthritis pain: a systematic literature review. *Eur J Pain* 2014;18:1367-  
333 75.
- 334 3. Neogi T, Guermazi A, Roemer F, Nevitt MC, Scholz J, Arendt-Nielsen L, et al.  
335 Association of Joint Inflammation With Pain Sensitization in Knee Osteoarthritis: The  
336 Multicenter Osteoarthritis Study. *Arthritis Rheumatol* 2016;68:654-61.
- 337 4. Graven-Nielsen T, Wodehouse T, Langford RM, Arendt-Nielsen L, and Kidd BL.  
338 Normalization of widespread hyperesthesia and facilitated spatial summation of deep-  
339 tissue pain in knee osteoarthritis patients after knee replacement. *Arthritis Rheum*  
340 2012;64:2907-16.
- 341 5. Kosek E and Ordeberg G. Lack of pressure pain modulation by heterotopic noxious  
342 conditioning stimulation in patients with painful osteoarthritis before, but not following,  
343 surgical pain relief. *Pain* 2000;88:69-78.
- 344 6. Petersen KK, Arendt-Nielsen L, Simonsen O, Wilder-Smith O, and Laursen MB.  
345 Presurgical assessment of temporal summation of pain predicts the development of  
346 chronic postoperative pain 12 months after total knee replacement. *Pain* 2015;156:55-61.
- 347 7. Malfait AM, Little CB, and McDougall JJ. A commentary on modelling osteoarthritis  
348 pain in small animals. *Osteoarthritis Cartilage* 2013;21:1316-26.
- 349 8. Malfait AM, Ritchie J, Gil AS, Austin JS, Hartke J, Qin W, et al. ADAMTS-5 deficient  
350 mice do not develop mechanical allodynia associated with osteoarthritis following medial  
351 meniscal destabilization. *Osteoarthritis Cartilage* 2010;18:572-80.
- 352 9. Miller RE, Belmadani A, Ishihara S, Tran PB, Ren D, Miller RJ, et al. Damage-  
353 associated molecular patterns generated in osteoarthritis directly excite murine  
354 nociceptive neurons through Toll-like receptor 4. *Arthritis Rheumatol* 2015;67:2933-43.
- 355 10. Miller RE, Tran PB, Das R, Ghoreishi-Haack N, Ren D, Miller RJ, et al. CCR2  
356 chemokine receptor signaling mediates pain in experimental osteoarthritis. *Proc Natl*  
357 *Acad Sci U S A* 2012;109:20602-7.
- 358 11. Inglis JJ, McNamee KE, Chia SL, Essex D, Feldmann M, Williams RO, et al. Regulation  
359 of pain sensitivity in experimental osteoarthritis by the endogenous peripheral opioid  
360 system. *Arthritis Rheum* 2008;58:3110-9.
- 361 12. Just S, Pawlak M, and Heppelmann B. Responses of fine primary afferent nerve fibres  
362 innervating the rat knee joint to defined torque. *J Neurosci Methods* 2000;103:157-62.
- 363 13. Kim YS, Anderson M, Park K, Zheng Q, Agarwal A, Gong C, et al. Coupled Activation  
364 of Primary Sensory Neurons Contributes to Chronic Pain. *Neuron* 2016;91:1085-96.
- 365 14. Emery EC, Luiz AP, Sikandar S, Magnusdottir R, Dong X, and Wood JN. In vivo  
366 characterization of distinct modality-specific subsets of somatosensory neurons using  
367 GCaMP. *Sci Adv* 2016;2:e1600990.

- 368 15. Miller RE, Ishihara S, Bhattacharyya B, Delaney A, Menichella DM, Miller RJ, et al.  
369 Chemogenetic Inhibition of Pain Neurons in a Mouse Model of Osteoarthritis. *Arthritis*  
370 *Rheum* In press;
- 371 16. Tran PB, Miller RE, Ishihara S, Miller RJ, and Malfait AM. Spinal Microglial Activation  
372 in a Murine Surgical Model of Knee Osteoarthritis. *Osteoarthritis Cartilage* In Press;
- 373 17. Kim YS, Chu Y, Han L, Li M, Li Z, Lavinka PC, et al. Central terminal sensitization of  
374 TRPV1 by descending serotonergic facilitation modulates chronic pain. *Neuron*  
375 2014;81:873-87.
- 376 18. Glasson SS, Blanchet TJ, and Morris EA. The surgical destabilization of the medial  
377 meniscus (DMM) model of osteoarthritis in the 129/SvEv mouse. *Osteoarthritis Cartilage*  
378 2007;15:1061-9.
- 379 19. Barton NJ, Strickland IT, Bond SM, Brash HM, Bate ST, Wilson AW, et al. Pressure  
380 application measurement (PAM): a novel behavioural technique for measuring  
381 hypersensitivity in a rat model of joint pain. *J Neurosci Methods* 2007;163:67-75.
- 382 20. Leuchtweis J, Imhof AK, Montechiaro F, Schaible HG, and Boettger MK. Validation of  
383 the digital pressure application measurement (PAM) device for detection of primary  
384 mechanical hyperalgesia in rat and mouse antigen-induced knee joint arthritis. *Methods*  
385 *Find Exp Clin Pharmacol* 2010;32:575-83.
- 386 21. da Silva Serra I, Husson Z, Bartlett JD, and Smith ES. Characterization of cutaneous and  
387 articular sensory neurons. *Mol Pain* 2016;12:
- 388 22. Ikeuchi M, Kolker SJ, and Sluka KA. Acid-sensing ion channel 3 expression in mouse  
389 knee joint afferents and effects of carrageenan-induced arthritis. *J Pain* 2009;10:336-42.
- 390 23. Schuelert N and McDougall JJ. Involvement of Nav 1.8 sodium ion channels in the  
391 transduction of mechanical pain in a rodent model of osteoarthritis. *Arthritis Res Ther*  
392 2012;14:R5.
- 393 24. Gomis A, Miralles A, Schmidt RF, and Belmonte C. Nociceptive nerve activity in an  
394 experimental model of knee joint osteoarthritis of the guinea pig: effect of intra-articular  
395 hyaluronan application. *Pain* 2007;130:126-36.
- 396 25. Schindelin J, Arganda-Carreras I, Frise E, Kaynig V, Longair M, Pietzsch T, et al. Fiji: an  
397 open-source platform for biological-image analysis. *Nat Methods* 2012;9:676-82.
- 398 26. Miller RE, Tran PB, Ishihara S, Larkin J, and Malfait AM. Therapeutic effects of an anti-  
399 ADAMTS-5 antibody on joint damage and mechanical allodynia in a murine model of  
400 osteoarthritis. *Osteoarthritis Cartilage* 2016;24:299-306.
- 401 27. Li L, Rutlin M, Abaira VE, Cassidy C, Kus L, Gong S, et al. The functional organization  
402 of cutaneous low-threshold mechanosensory neurons. *Cell* 2011;147:1615-27.
- 403 28. McMahon SB, Armanini MP, Ling LH, and Phillips HS. Expression and coexpression of  
404 Trk receptors in subpopulations of adult primary sensory neurons projecting to identified  
405 peripheral targets. *Neuron* 1994;12:1161-71.
- 406 29. Usoskin D, Furlan A, Islam S, Abdo H, Lonnerberg P, Lou D, et al. Unbiased  
407 classification of sensory neuron types by large-scale single-cell RNA sequencing. *Nat*  
408 *Neurosci* 2015;18:145-53.
- 409 30. Xu ZZ, Kim YH, Bang S, Zhang Y, Berta T, Wang F, et al. Inhibition of mechanical  
410 allodynia in neuropathic pain by TLR5-mediated A-fiber blockade. *Nat Med*  
411 2015;21:1326-31.
- 412 31. Wu Q and Henry JL. Changes in Abeta non-nociceptive primary sensory neurons in a rat  
413 model of osteoarthritis pain. *Mol Pain* 2010;6:37.

- 414 32. Schuelert N, Zhang C, Mogg AJ, Broad LM, Hepburn DL, Nisenbaum ES, et al.  
415 Paradoxical effects of the cannabinoid CB2 receptor agonist GW405833 on rat  
416 osteoarthritic knee joint pain. *Osteoarthritis Cartilage* 2010;18:1536-43.  
417 33. Schuelert N, Johnson MP, Oskins JL, Jassal K, Chambers MG, and McDougall JJ. Local  
418 application of the endocannabinoid hydrolysis inhibitor URB597 reduces nociception in  
419 spontaneous and chemically induced models of osteoarthritis. *Pain* 2011;152:975-81.

420

421

## 422 Tables

423 **Table 1:** Percentage of L4 DRG neurons retrogradely-labeled after intra-articular injection of DiI

424

## 425 Figure Legends

426 **Figure 1:** Wild-type mice that have undergone DMM surgery have increased (A) primary knee  
427 hyperalgesia and (B) secondary paw hyperalgesia 8 weeks after surgery compared to sham and  
428 age-matched naïve mice (\*\* $p < 0.01$ , \*\*\* $p < 0.001$ , \*\*\*\* $p < 0.0001$ ). mean $\pm$ SEM.

429 **Figure 2:** Eight weeks after surgery, paw- and knee-directed stimuli cause increased numbers of  
430 L4 DRG neuron responses in DMM mice compared to sham mice. (A) Representative images  
431 depicting L4 DRG neurons at baseline and responding to a 100 g pinch of the ipsilateral hind  
432 paw. Scale bars = 250  $\mu$ m. Insets show examples of responding neurons shown with the arrow.  
433 The arrow also identifies examples of neuron clusters. Scale bar in insets = 50  $\mu$ m. (B) Percent of  
434 neurons responding to 100 g ipsilateral paw pinch (# responding neurons / # total neurons in the  
435 field of view  $\times$  100). (C) Percent of neurons responding to 30 g ipsilateral knee pinch. (D)  
436 Percent of neurons responding to noxious knee twist. Each dot shows the percent of neurons that  
437 responded to the stimulus in one mouse L4 DRG. \* $p < 0.05$ , \*\* $p < 0.01$ . mean $\pm$ SEM.

438 **Figure 3:** The size of responding neurons is similar in DMM and sham mice. (A-C) Relative  
439 frequency distributions of the areas of responding neurons in sham and DMM mice to (A) 100 g  
440 paw pinch (interaction of size and treatment (sham/DMM):  $p = 0.9888$ ), (B) 30 g knee pinch  
441 (interaction of size and treatment:  $p = 0.9912$ ), and (C) noxious knee twist (interaction of size and  
442 treatment:  $p = 0.9474$ ). mean $\pm$ SEM. (D) Median area of responding cells. Sham vs. DMM, paw  
443 pinch:  $p = 0.6770$ ; knee pinch:  $p = 0.9798$ ; knee twist:  $p = 0.8089$ . median $\pm$ IQR.

444 **Figure 4:** The spatial organization of responding neurons is similar in DMM and sham mice. (A)  
445 The percentage of responding neurons that were coupled in each DRG (# responding neurons  
446 touching at least one other responding neuron / total # responding neurons  $\times$  100). Sham vs.  
447 DMM, paw pinch:  $p = 0.6222$ ; knee pinch:  $p = 0.3718$ ; knee twist:  $p = 0.3925$ . mean $\pm$ SEM. (B) The  
448 mean number of responding neurons that made up an individual cluster in each DRG (# coupled

449 responding neurons / # clusters x 100). Sham *vs.* DMM, paw pinch:  $p=0.4025$ ; knee pinch:  
450  $p=0.7136$ ; knee twist:  $p=0.4030$ . median $\pm$ IQR. (C) The mean nearest neighbor distance for  
451 responding neurons in each DRG. Sham *vs.* DMM, paw pinch:  $p=0.8596$ ; knee pinch:  $p=0.4319$ ;  
452 knee twist:  $p>0.9999$ . median $\pm$ IQR.

453 **Figure 5:** The magnitude and duration of (Ca)<sub>i</sub> responses are similar in DMM and sham mice.  
454 (A) Individual traces (grey) and mean $\pm$ SEM (black) of  $\Delta F/F_0$  for neurons in a representative  
455 DMM DRG responding to 100 g paw pinch. (B) The mean maximum  $\Delta F/F_0$  of responding  
456 neurons for each DRG. Sham *vs.* DMM, paw pinch:  $p=0.2312$ ; knee pinch:  $p=0.6151$ ; knee twist:  
457  $p=0.9646$ . mean $\pm$ SEM. (C) The mean area under the curve of responding neurons for each DRG.  
458 Sham *vs.* DMM, paw pinch:  $p=0.2740$ ; knee pinch:  $p=0.8596$ ; knee twist:  $p=0.6786$ .  
459 median $\pm$ IQR.

460 **Supplemental Figure 1:** Representative images of the L4 ipsilateral DRG of (A) naïve, (B)  
461 sham, and (C) DMM mice 7 days after retrograde label with DiI, which was injected into the  
462 ipsilateral knee joint intra-articularly. Neurons were counter-stained with PGP9.5, a pan-  
463 neuronal marker, for normalization purposes. Scale bar = 100  $\mu$ m.

464 **Supplemental Video 1:** Representative video of a DMM DRG responding to paw pinch (2 fps).

465 **Supplemental Video 2:** Representative video of a sham DRG responding to paw pinch (2 fps).

466 **Supplemental Video 3:** Representative video of a DMM DRG responding to knee pinch (2 fps).

467 **Supplemental Video 4:** Representative video of a sham DRG responding to knee pinch (2 fps).

468 **Supplemental Video 5:** Representative video of a DMM DRG responding to knee twist (2 fps).

469 **Supplemental Video 6:** Representative video of a sham DRG responding to knee twist (2 fps).



**Table 1. Percentage of L4 DRG Neurons Retrogradely-Labeled 7 Days after Intra-articular Injection of Dil**

| <b>Treatment</b> | <b># labeled neurons</b> | <b># total neurons</b> | <b>% labeled</b> | <b>median</b> | <b>p-value</b>          |
|------------------|--------------------------|------------------------|------------------|---------------|-------------------------|
| <b>Naïve</b>     | 56                       | 389                    | 14.4             | 15.4          | >0.9999 vs sham and DMM |
|                  | 79                       | 445                    | 17.8             |               |                         |
|                  | 78                       | 506                    | 15.4             |               |                         |
| <b>Sham</b>      | 29                       | 478                    | 6.1              | 14.3          | >0.9999 vs DMM          |
|                  | 48                       | 565                    | 8.5              |               |                         |
|                  | 48                       | 423                    | 11.3             |               |                         |
|                  | 77                       | 403                    | 19.1             |               |                         |
|                  | 62                       | 358                    | 17.3             |               |                         |
|                  | 78                       | 448                    | 17.4             |               |                         |
| <b>DMM</b>       | 99                       | 627                    | 15.8             | 15.3          |                         |
|                  | 60                       | 415                    | 14.5             |               |                         |
|                  | 98                       | 648                    | 15.1             |               |                         |
|                  | 64                       | 409                    | 15.6             |               |                         |
|                  | 108                      | 399                    | 27.1             |               |                         |
|                  | 65                       | 462                    | 14.1             |               |                         |

Fig 1

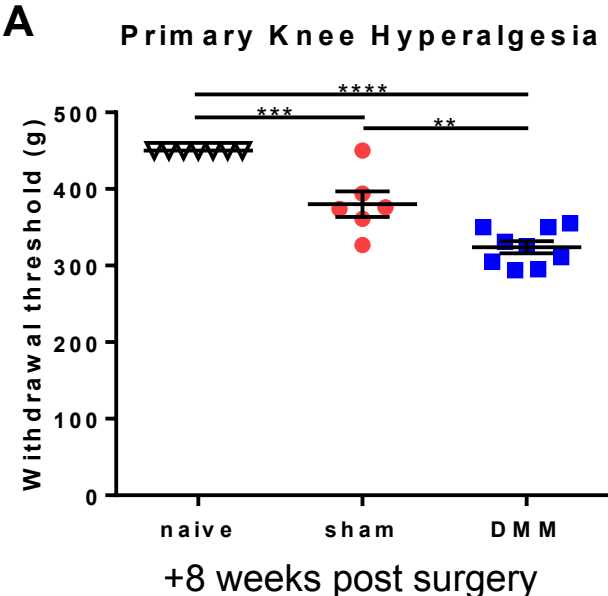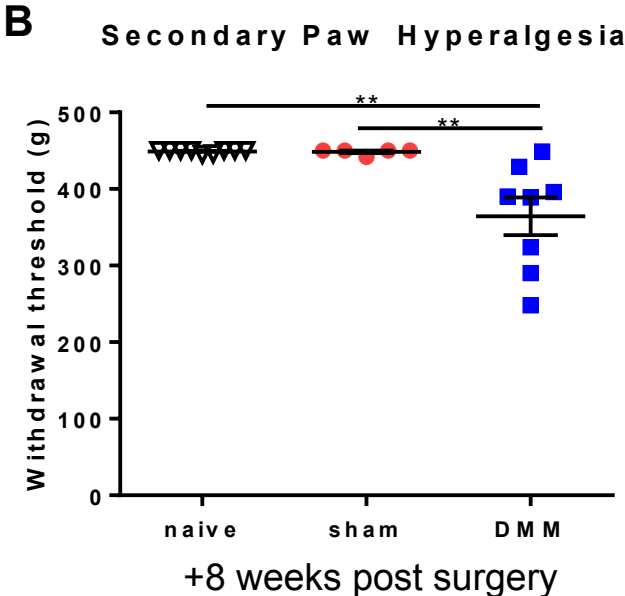

**Fig 2**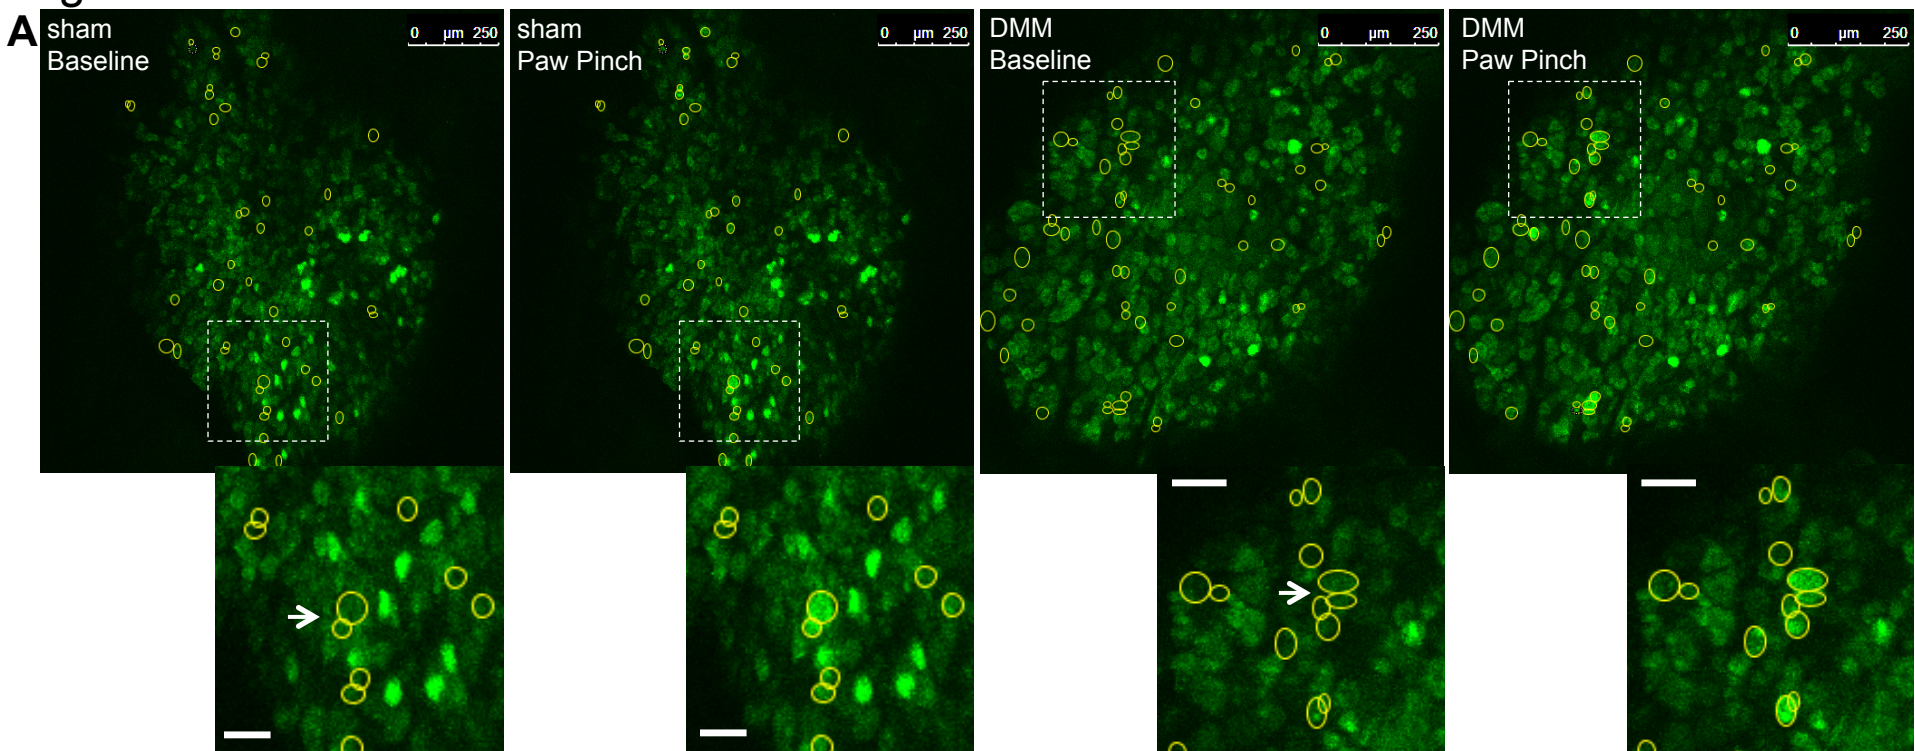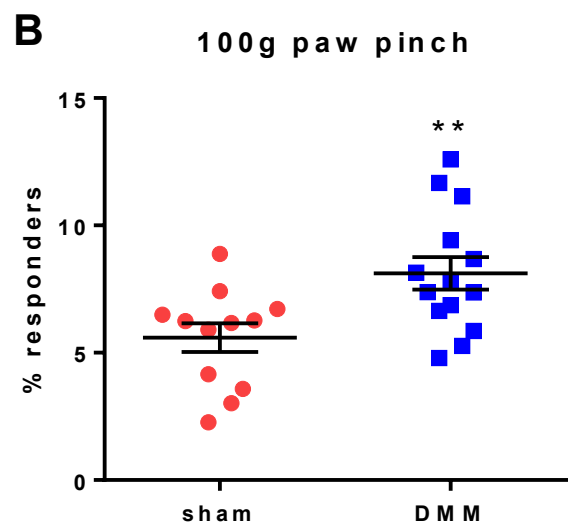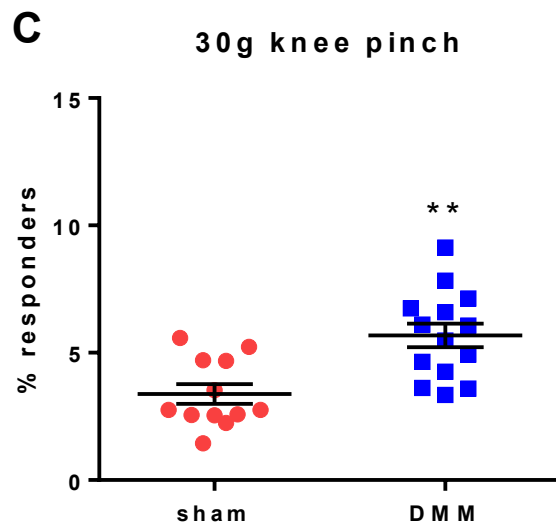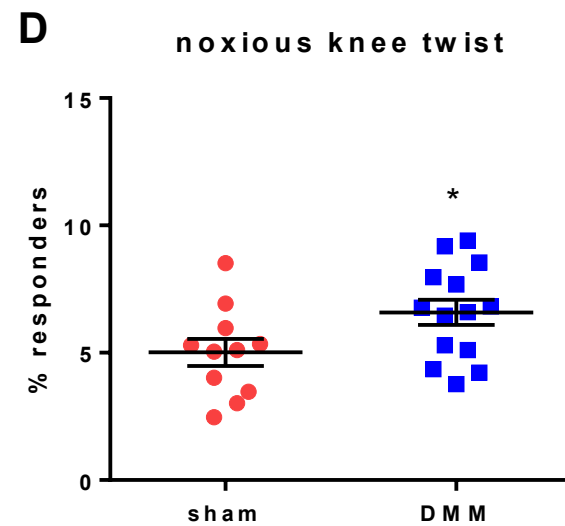

Fig 3

A

100g Paw Pinch

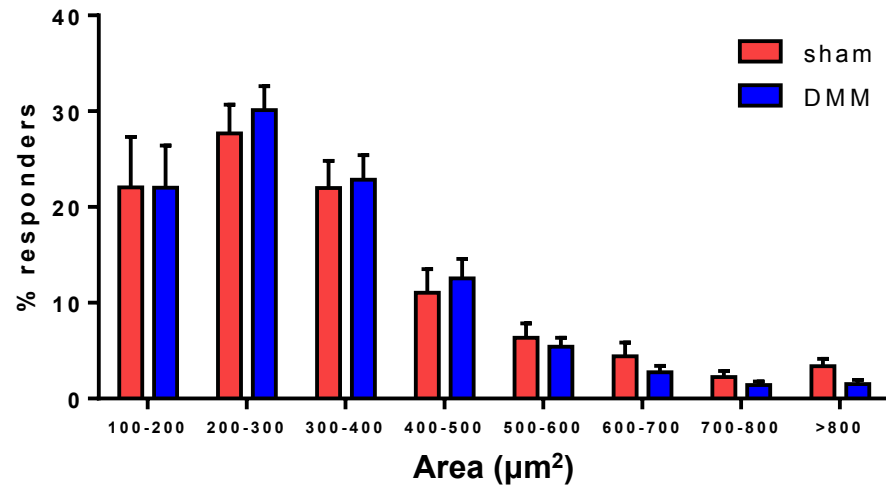

B

30g Knee Pinch

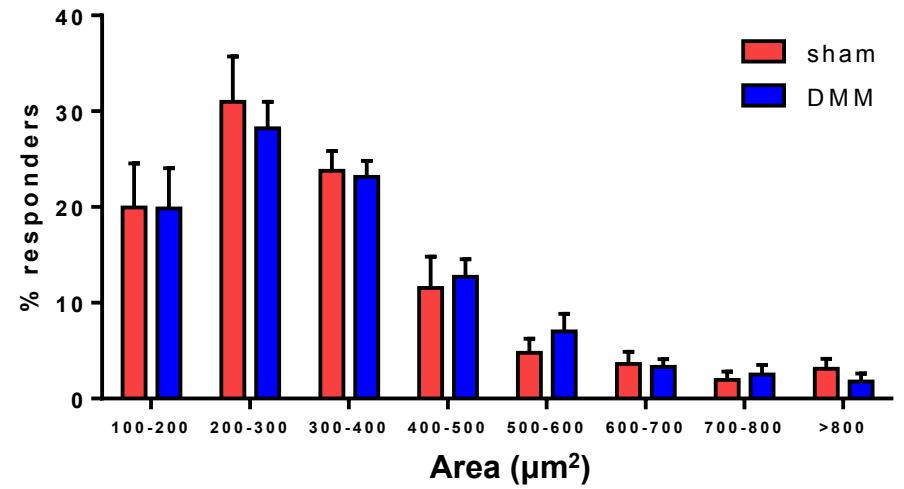

C

Noxious Knee Twist

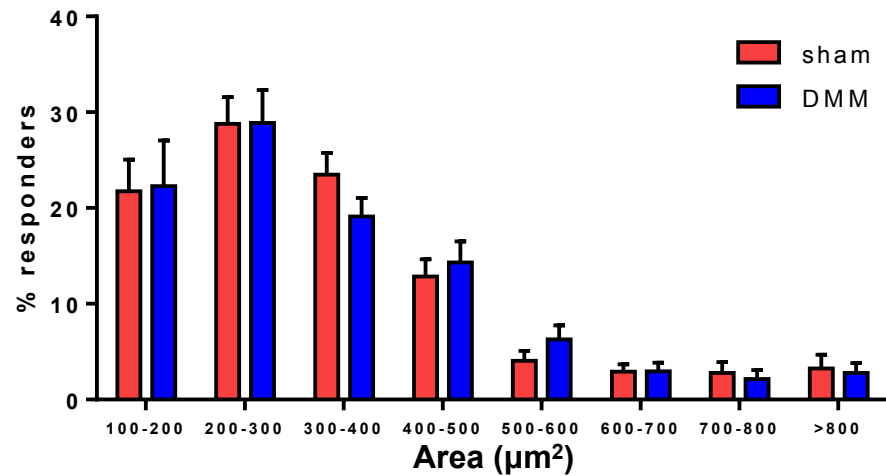

D

Median Area

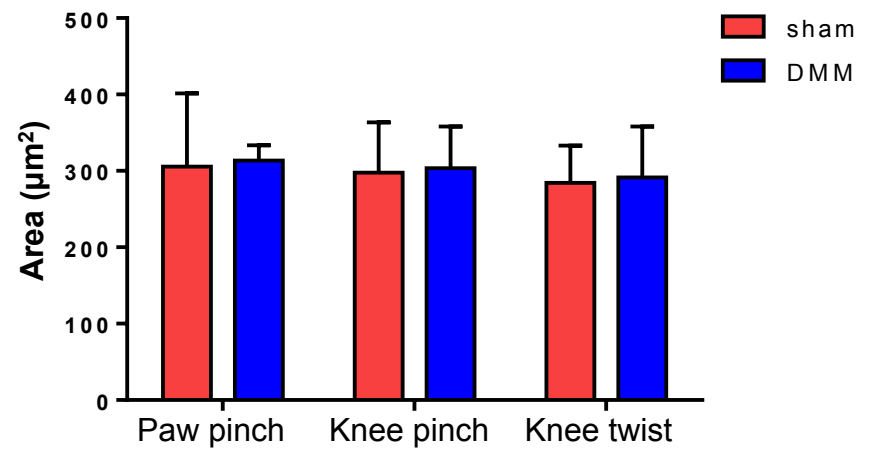

Fig 4

**A**

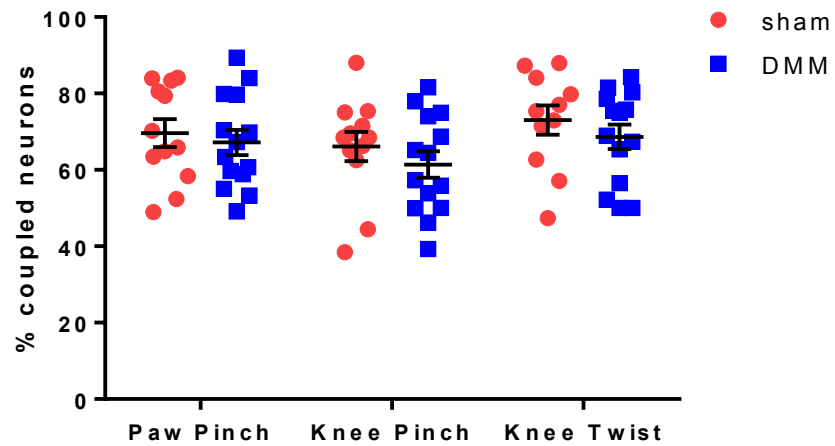

**B**

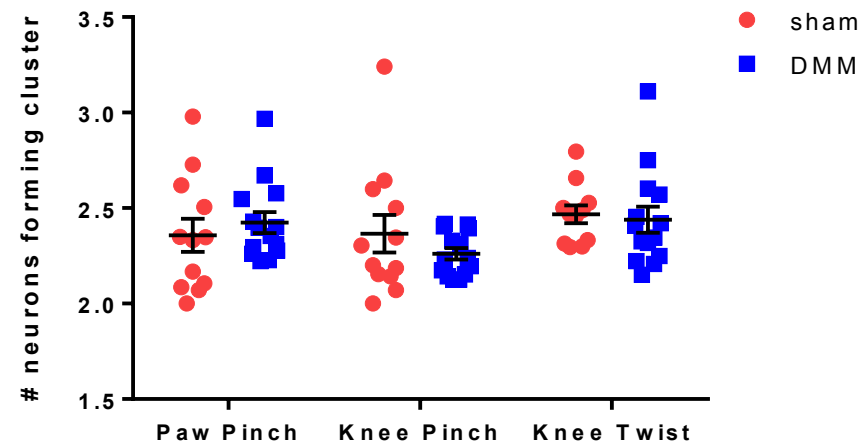

**C**

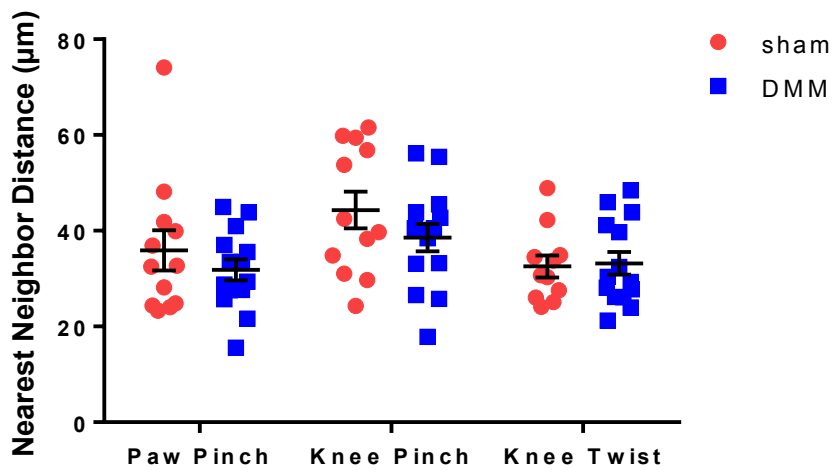

Fig 5

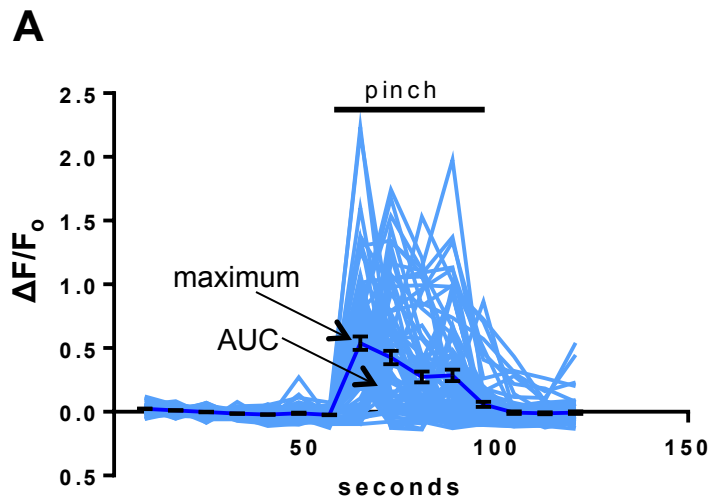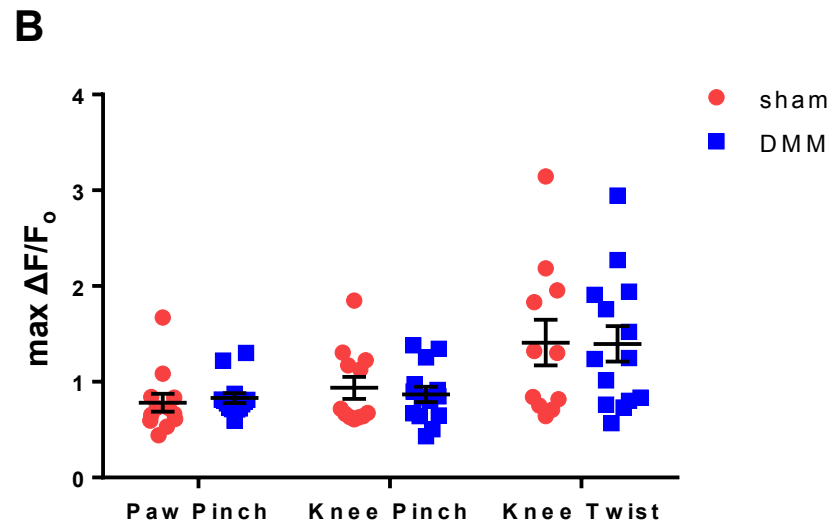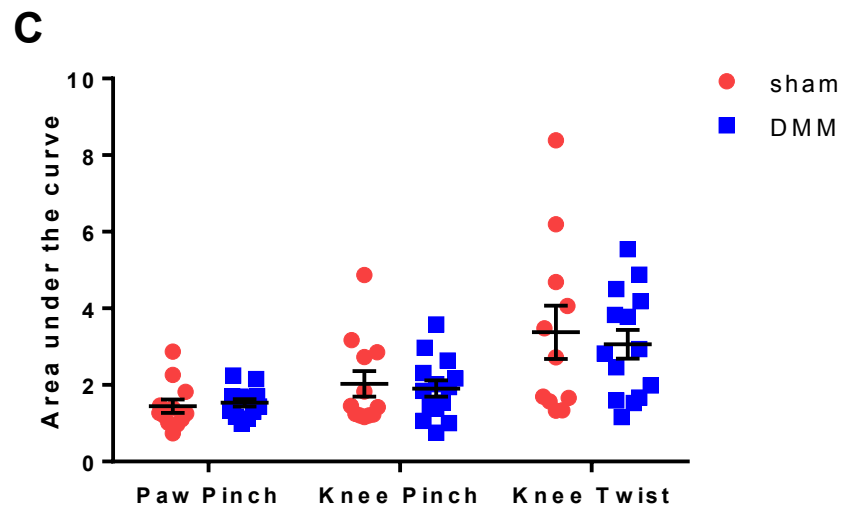

Source: http://www.biorxiv.org/content/10.1101/160416v1.full.pdf
